# Supplementary material for: Liposomal IR-780 as a Highly Stable Nanotheranostic Agent for Improved Photothermal/Photodynamic Therapy of Brain Tumors by Convection-Enhanced Delivery
Source: Cancers (Basel). 2021 Jul 22;13(15):3690. doi: 10.3390/cancers13153690 (PMC8345063; doi:10.3390/cancers13153690)
Supplement: Supplementary file 1 [file cancers-13-03690-s001.zip › cancers-1249585-supplementary.pdf]

## Supplementary Material

### Liposomal IR-780 as a Highly Stable Nanotheranostic Agent for Improved Photothermal/Photodynamic Therapy of Brain Tumors by Convection-Enhanced Delivery

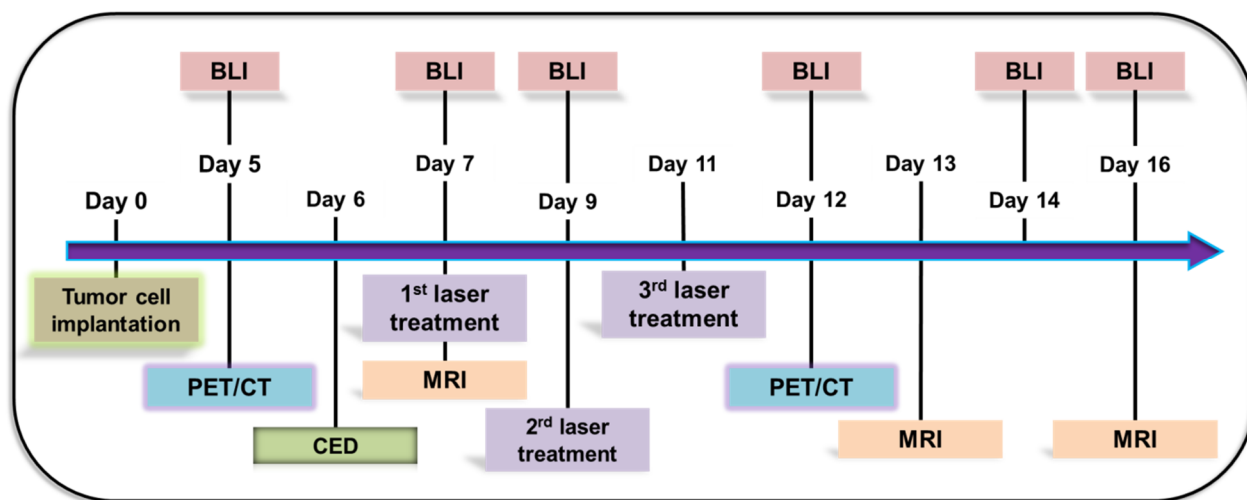

**Figure S1.** The timeline for establishing intracranial xenograft tumor model, convention-enhanced delivery (CED) and assessment of anti-tumor efficacy by bioluminescence imaging (BLI), magnetic resonance imaging (MRI), as well as positron emission tomography/computed tomography (PET/CT).

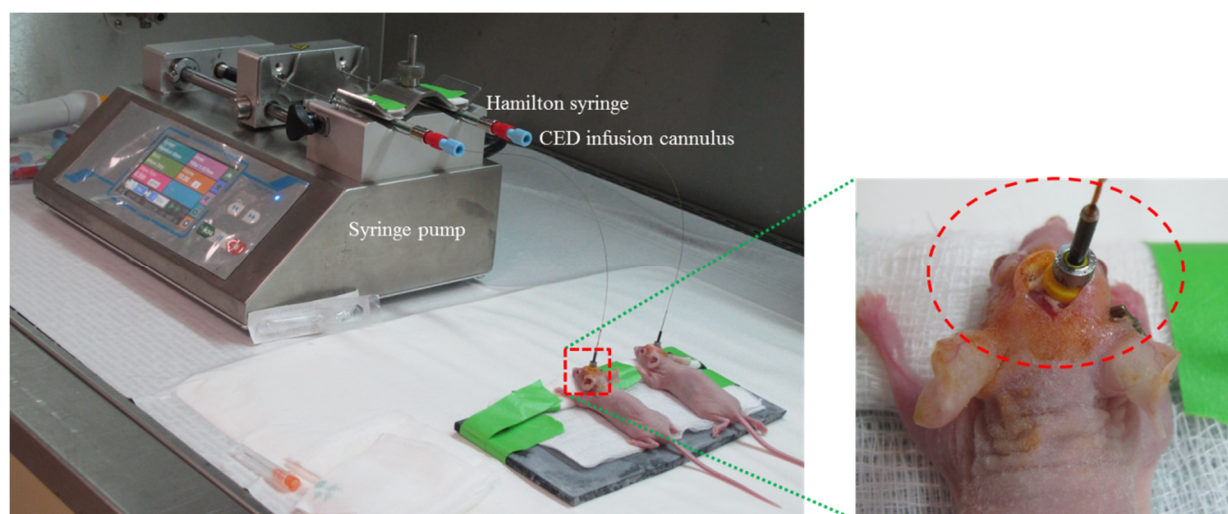

**Figure S2.** The pictures showing the administration of samples into mouse brain via convention-enhanced delivery (CED).

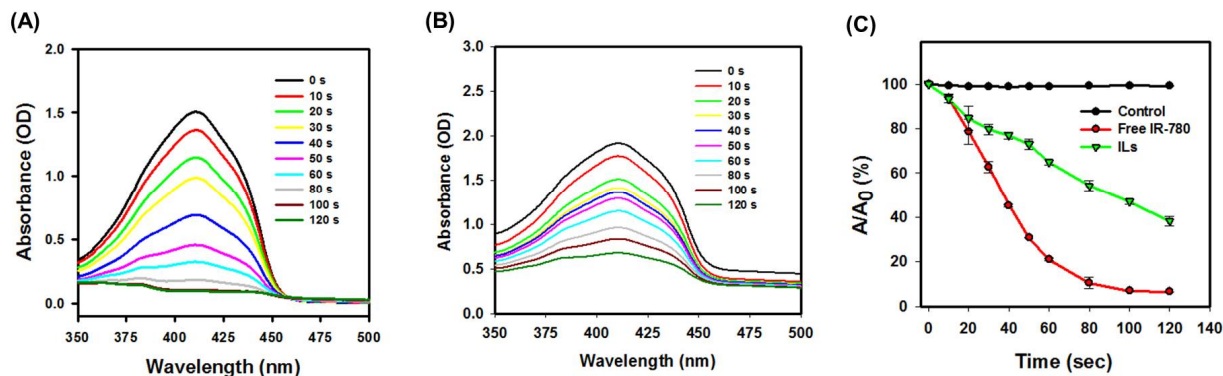

**Figure S3.** The ROS generation with DPBF probe due to NIR irradiation ( $1 \text{ W/cm}^2$ ) of free IR-780 (A) and ILs (B) solution for 120 s. (C) The change of relative absorbance ( $A/A_0$ ) at 410 nm of free IR-780, ILs and PBS (control).

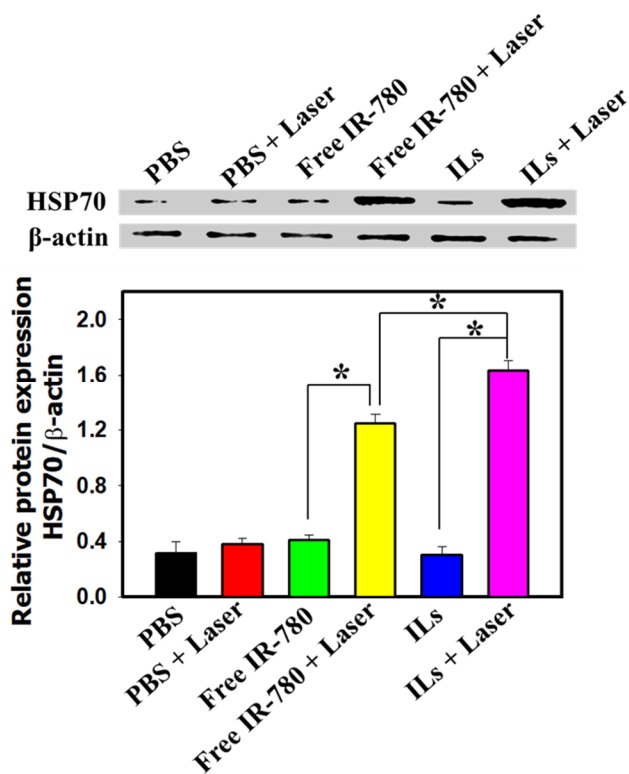

**Figure S4.** The expression of heat shock protein 70 (HSP70) by U87MG cells from Western blot analysis by treating with PBS (control), IR-780 or ILs with or without NIR laser irradiation.

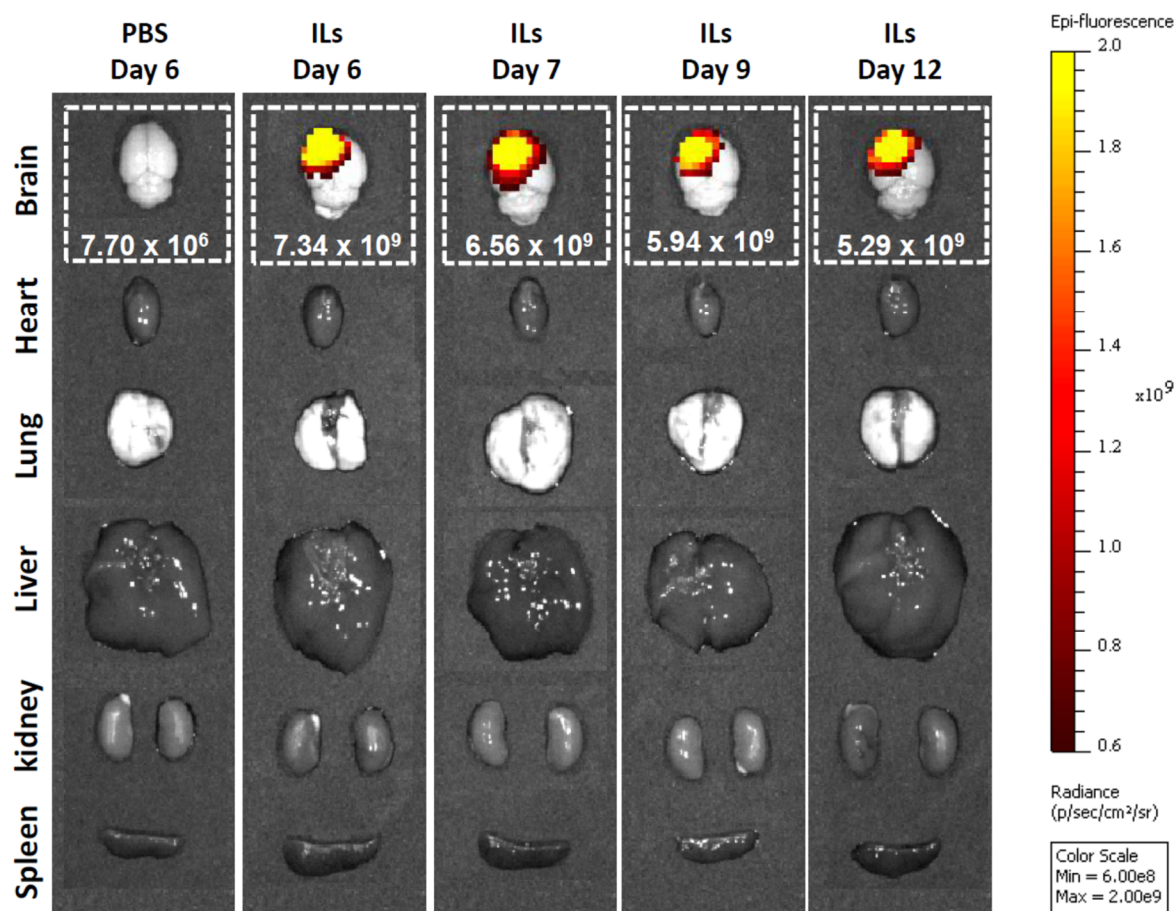

**Figure S5.** The ex vivo NIR fluorescence imaging of explanted brain and major organs from tumor-bearing mice after CED of ILs or PBS (control) at different times post-implantation of U87MG cells. The fluorescence signal intensity within the ROI of the explanted brain is shown below the images.

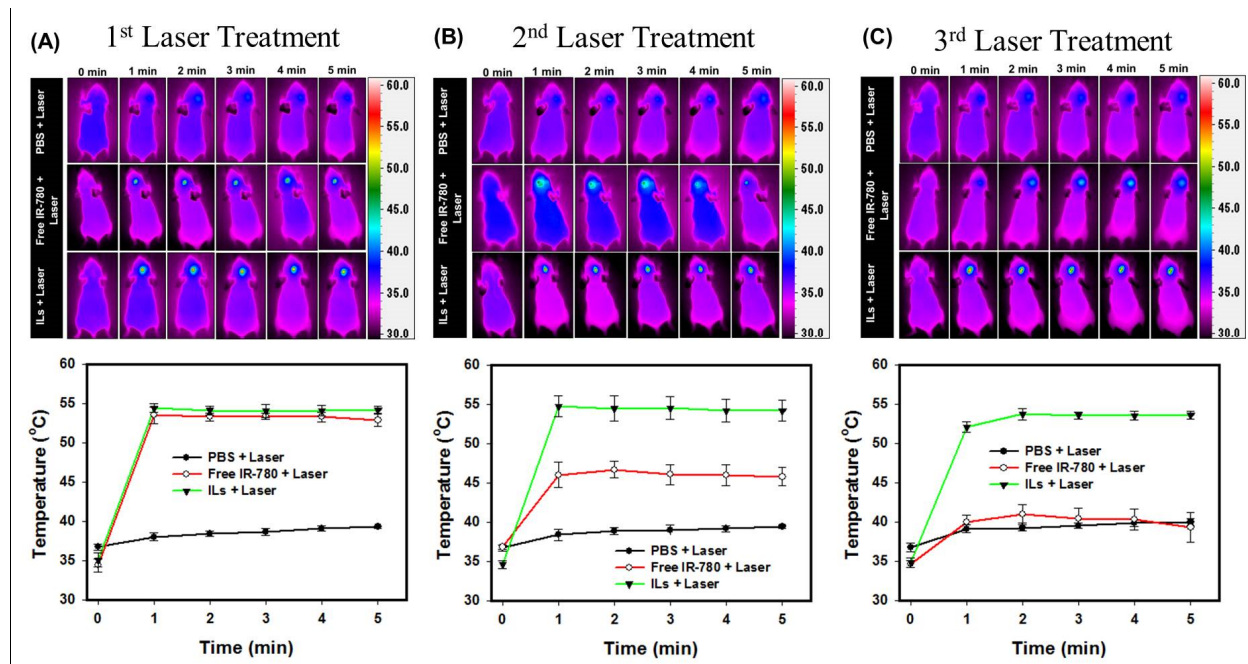

**Figure S6.** The representative real-time temperature distribution and the time-lapsed peak temperature profiles (mean  $\pm$  SD,  $n = 4$ ) of tumor-bearing nude mice. One, three and five days after convection-enhanced delivery (CED) of PBS, free IR-780 or ILs to tumor-bearing mice, the brain was irradiated with NIR laser (1 W/cm<sup>2</sup>) for 5 min and thermal images were captured with an infrared camera during the 1st (A), 2<sup>nd</sup> (B) and 3<sup>rd</sup> (C) laser treatment.

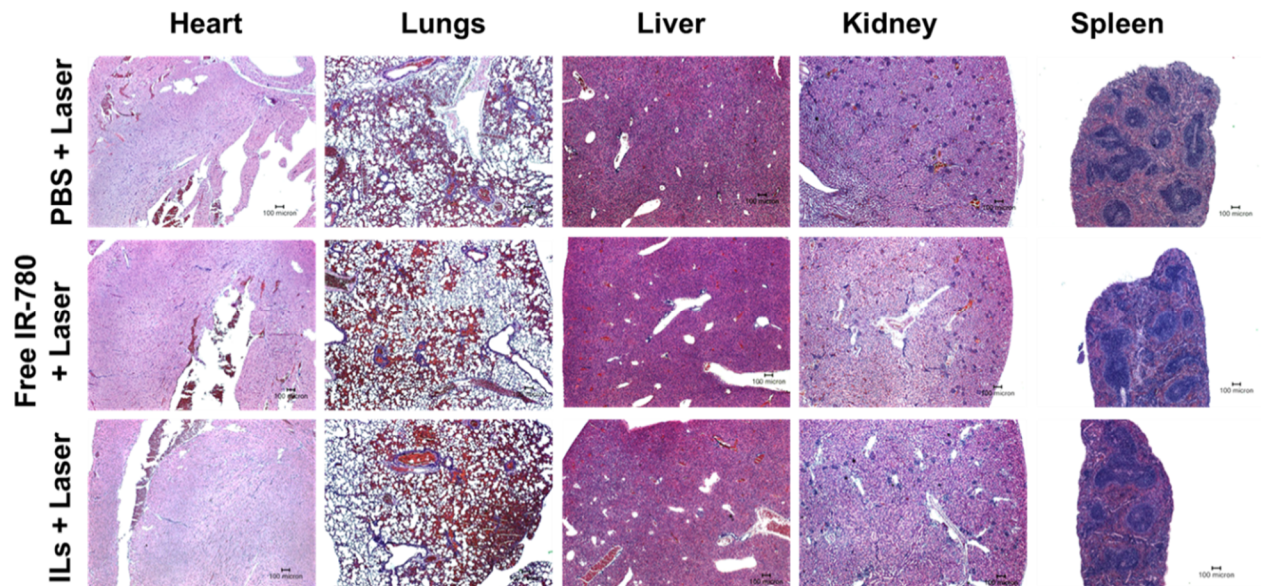

**Figure S7.** The H&E staining results of tissue sections from major organs of tumor-bearing mice after different treatments. Bar = 100  $\mu$ m.

**Table S1.** The hematological parameters and biochemistry analysis from treated mice.

| Items                         | PBS + Laser    | Free IR-780 + Laser | ILs + Laser       |
|-------------------------------|----------------|---------------------|-------------------|
| WBC (10 <sup>9</sup> /L)      | 5.76 ± 2.66    | 8.86 ± 3.98*        | 4.63 ± 2.77*, #   |
| RBC (10 <sup>12</sup> /L)     | 8.18 ± 0.05    | 8.45 ± 0.41*        | 8.82 ± 0.66*, #   |
| Platelet (10 <sup>9</sup> /L) | 133.13 ± 12.54 | 141.33 ± 11.01*     | 136.13 ± 9.16*, # |
| Hemoglobin (g/L)              | 972 ± 86.6     | 860 ± 112.2*        | 1024 ± 156.5*, #  |
| AST (IU/L)                    | 86 ± 8.9       | 80 ± 11.2*          | 93.7 ± 16.5*, #   |
| ALT (IU/L)                    | 129 ± 10.67    | 122 ± 18.1*         | 137 ± 23.73*, #   |
| BUN(mmol/L)                   | 43.5 ± 4.5     | 40 ± 2.44*          | 40.33 ± 5.4*, #   |

WBC, white blood cells; RBC, red blood cells, AST, aspartate aminotransferase; ALT, alanine aminotransferase, BUN, blood urea nitrogen. \*  $p > 0.05$  compared with PBS + Laser, #  $p > 0.05$  compared with free IR-780 + Laser.
